# Supplementary material
Source: PubMed Central journal article supplement (PMC7649327)
Supplement: sj-pdf-1-tia-10.1177_2331216520967850.pdf [file sj-pdf-1-tia-10.1177_2331216520967850.pdf]

1  
2  
3 **SUPPLEMENTAL MATERIALS**  
4

5  
6  
7 **Absorption and enjoyment during listening to acoustically masked stories**  
8

9  
10  
11 Björn Herrmann<sup>1-3\*</sup> & Ingrid S. Johnsrude<sup>3,4</sup>  
12

13  
14 <sup>1</sup>Rotman Research Institute,  
15 Baycrest, M6A 2E1, North York, ON, Canada

16 <sup>2</sup>Department of Psychology,  
17 University of Toronto, M5S 1A1, Toronto, ON, Canada

18 <sup>3</sup>Department of Psychology,  
19 University of Western Ontario, N6A 3K7, London, ON, Canada

20 <sup>4</sup>School of Communication Sciences & Disorders,  
21 University of Western Ontario, N6A 5B7, London, ON, Canada  
22

23  
24 \*Correspondence concerning this article should be addressed to Björn Herrmann, Rotman Research  
25 Institute, Baycrest, 3560 Bathurst St, North York, ON, M6A 2E1, Canada. E-mail: herrmann.b@gmail.com  
26

### 27 Supplemental analyses for Experiment 2a

28 For Experiment 2a, participants listened to short snippets (sentences/phrases/words) extracted from a  
29 5-min story from 'The Moth' podcast. The speech snippets were presented under 'clear', +12 dB SNR,  
30 or +4 dB SNR conditions (with equal proportions). After each speech snippet, participants reported what  
31 they heard by typing it into the computer using the keyboard. The proportion of missed and incorrectly  
32 reported words was calculated, here referred to as word-report errors (see also Figure 2 of the main  
33 article).

34 **Analyses using non-parametric statistics.** Non-parametric Wilcoxon tests comparing median word-  
35 report errors between conditions revealed the following effects. Errors were greater for +12 dB SNR  
36 than clear ( $p = 0.0027$ ), greater for +4 dB SNR than +12 dB SNR ( $p = 1.9 \times 10^{-5}$ ), and greater for +4 dB SNR  
37 than clear ( $p = 6.3 \times 10^{-6}$ ) and were higher for non-native compared to native English speakers ( $p =$   
38  $0.0434$ ).

39 **Analyses using RAU transform.** We also used the "rationalized" arcsine transform (RAU; Studebaker,  
40 1985) to transform data closer to a normal distribution, and calculated an ANOVA with the within-subject  
41 factor Condition (clear, +12 dB SNR, +4 dB SNR) and the between-subject factor Nativeness (native, non-  
42 native English speaker). Word-report errors increased with decreasing signal-to-noise ratio (main effect  
43 of Condition:  $F_{2,50} = 36.580$ ,  $p < 1 \times 10^{-6}$ ; Errors were greater for +12 dB SNR than clear:  $t_{26} = 3.094$ ,  $p =$   
44  $0.005$ ; greater for +4 dB SNR than +12 dB SNR:  $t_{26} = 7.132$ ,  $p < 1 \times 10^{-6}$ ; and greater for +4 dB SNR than  
45 clear:  $t_{26} = 8.802$ ,  $p = p < 1 \times 10^{-6}$ ) and were higher for non-native compared to native English speakers  
46 (main effect of Nativeness:  $F_{1,25} = 10.930$ ,  $p = 0.003$ ). There was no interaction between Condition and  
47 Nativeness ( $F_{2,50} = 0.878$ ,  $p = 0.422$ ).

48 **Analyses limited to data from native English speakers.** Non-parametric Wilcoxon tests comparing median  
49 word-report errors between conditions revealed more errors for +12 dB SNR than clear ( $p = 0.0209$ ),  
50 greater for +4 dB SNR than +12 dB SNR ( $p = 8.8 \times 10^{-5}$ ), and greater for +4 dB SNR than clear ( $p = 8.8 \times 10^{-5}$ )  
51 <sup>5)</sup>

### 52 Supplemental analyses for Experiment 2b

53 Different groups of people listened to a 5-min story under one of the three masking conditions (clear,  
54 +12 dB SNR, +4 dB SNR) and subsequently rated absorption, enjoyment, effort, and comprehension  
55 statements. Linear regression models were calculated separately to predict absorption, enjoyment,  
56 effort, and comprehension.

57 **Analyses without nuisance predictors.** The predictor for each regression was Condition (clear, SNR12,  
58 SNR4); in this supplemental analysis, nuisance predictors were not included (see main article for analyses  
59 with Nativeness, Sex, and Age included as predictors). Regression analyses did not reveal an effect of  
60 Condition on story absorption ( $t_{86} = 0.9439$ ,  $p = 0.3479$ ), suggesting that individuals are similarly

61 absorbed by an engaging story under clear conditions and moderate masking. Enjoyment was  
62 significantly affected by Condition ( $t_{86} = 2.1347$ ,  $p = 0.0356$ ): Enjoyment was rated lower for +12 dB SNR  
63 ( $t_{57} = 2.2138$ ,  $p = 0.0309$ ) and +4 dB SNR ( $t_{56} = 2.1836$ ,  $p = 0.0331$ ) compared to the clear condition. The  
64 +12 dB SNR and +4 dB SNR conditions did not differ ( $t_{57} = 0.1327$ ,  $p = 0.8949$ ). Effort significantly  
65 increased as SNR declined ( $t_{86} = 7.1861$ ,  $p = 2.3 \times 10^{-10}$ ), such that effort was rated higher for +12 dB SNR  
66 ( $t_{57} = 3.1973$ ,  $p = 0.0023$ ) and +4dB SNR ( $t_{57} = 7.5933$ ,  $p = 3.3 \times 10^{-10}$ ) than for clear, and higher for +4 dB  
67 SNR than +12 dB SNR ( $t_{56} = 3.7470$ ,  $p = 0.0004$ ). Moreover, story comprehension was affected by  
68 Condition ( $t_{86} = 2.9205$ ,  $p = 0.0045$ ): comprehension was rated lower for the +4 dB SNR condition  
69 compared to clear speech ( $t_{57} = 2.7686$ ,  $p = 0.0076$ ).

70 **Analyses for native English speakers.** We also examined whether the pattern of results reported in the  
71 main article is similar to the results pattern when we limit our analysis to native English speakers. There  
72 was no effect of Condition on story absorption ( $t_{60} = 1.1305$ ,  $p = 0.2628$ ; none of the other predictors  
73 were significant,  $p > 0.3$ ), suggesting that individuals are similarly absorbed by an engaging story under  
74 clear conditions and moderate masking. Enjoyment was significantly affected by Condition ( $t_{60} = 2.0141$ ,  
75  $p = 0.0485$ ; none of the other predictors were significant,  $p > 0.5$ ): Enjoyment was rated lower for +4 dB  
76 SNR compared to the clear condition, but this difference was only marginally significant ( $t_{40} = 1.9584$ ,  $p$   
77  $= 0.0572$ ). Enjoyment ratings did not differ between +12 dB SNR and clear conditions ( $t_{39} = 1.6783$ ,  $p$   
78  $= 0.1013$ ) nor between +12 dB SNR and +4 dB SNR conditions ( $t_{37} = 0.3623$ ,  $p = 0.7192$ ). Effort significantly  
79 increased as SNR declined ( $t_{60} = 6.4319$ ,  $p = 2.3 \times 10^{-8}$ ; none of the other predictors were significant,  $p >$   
80  $0.5$ ), such that effort was rated higher for +12 dB SNR ( $t_{39} = 2.1413$ ,  $p = 0.0386$ ) and +4dB SNR ( $t_{40} =$   
81  $6.6134$ ,  $p = 6.5 \times 10^{-8}$ ) than for clear, and higher for +4 dB SNR than +12 dB SNR ( $t_{37} = 3.7646$ ,  $p = 0.0006$ ).  
82 Moreover, story comprehension was affected by Condition ( $t_{60} = 2.1835$ ,  $p = 0.0329$ ; none of the other  
83 predictors were significant,  $p > 0.1$ ): comprehension was rated lower for the +4 dB SNR condition  
84 compared to clear speech ( $t_{40} = 2.0790$ ,  $p = 0.0441$ ). These analyses show that the pattern of results for  
85 native English speakers is similar to that reported in the main article (utilizing the combined data from  
86 native and non-native English speakers).

87 **Correlations using raw scores.** In order to assess whether absorption and enjoyment ratings correlated  
88 with each other and/or with effort ratings, Pearson correlations were calculated between absorption  
89 ratings and enjoyment ratings and effort ratings, and between enjoyment ratings and effort ratings. To  
90 ensure that these analyses are not biased by any mean differences among speech conditions (clear, +12  
91 dB SNR, +4 dB SNR), we subtracted the mean rating from the rating of each individual, separately for  
92 each speech condition and measure (absorption, enjoyment, effort) prior to these analyses. We  
93 observed a strong correlation between absorption and enjoyment ( $r = 0.753$ ,  $p = 2.6 \times 10^{-17}$ ), and  
94 moderate negative correlations between absorption and effort ( $r = -0.293$ ,  $p = 0.0056$ ) and enjoyment  
95 and effort ( $r = -0.404$ ,  $p = 9.1 \times 10^{-5}$ ).

96 **Relation between absorption, enjoyment, and effort for native English speakers.** In order to investigate  
97 for native English speakers whether absorption, enjoyment, and effort share variance that may explain

98 some of the inter-individual differences, correlations were calculated among these measures (after  
99 regressing out Sex and Age). We observed a positive correlation between absorption and enjoyment ( $r$   
100 = 0.755,  $p = 5.75 \times 10^{-13}$ ), and negative correlations between absorption and effort (marginally significant;  
101  $r = -0.233$ ,  $p = 0.0641$ ) and enjoyment and effort ( $r = -0.329$ ,  $p = 0.008$ ). These results mirror those  
102 reported in the main article where data from native and non-native English speakers were used.

### 103 Supplemental analyses for Experiment 3

104 Participants listened to the audio of a 6-min audiovisual narrative summary of the first seven movies of  
105 the Harry Potter franchise in added twelve-talker babble noise at +4 dB SNR. After listening to the  
106 summary, participants rated absorption, enjoyment, effort, and comprehension statements.  
107 Participants also rated statements about liking Harry Potter and familiarity with Harry Potter from which  
108 we calculated a “Harry Potter score”.

109 ***Correlations without nuisance predictors.*** Pearson correlations between the Harry Potter score and each  
110 of the listening experience measures were calculated (see also Figure 5 of the main article). All four  
111 correlations between the Harry Potter score and the listening experience measures were significant:  
112 absorption ( $r = 0.379$ ,  $p = 0.0055$ ), enjoyment ( $r = 0.459$ ,  $p = 6.1 \times 10^{-4}$ ), effort ( $r = -0.285$ ,  $p = 0.0406$ ),  
113 and comprehension ( $r = 0.657$ ,  $p = 1.2 \times 10^{-7}$ ).

114

### 115 Supplemental analyses for Experiment 4

116 ***Non-parametric analyses.*** For each story number (1<sup>st</sup>, 2<sup>nd</sup>, 3<sup>rd</sup>, 4<sup>th</sup> story) and each measure (motivation,  
117 absorption, enjoyment, effort, comprehension), a non-parametric ranksum test was calculated to  
118 compare groups (clear, +4 dB SNR). False discovery rate (FDR) was used to account for multiple  
119 comparisons (Benjamini and Hochberg, 1995; Genovese et al., 2002). As for the regression analyses in  
120 the main article, motivation ( $p = 0.0005$ ), absorption ( $p = 0.0002$ ), and enjoyment ( $p = 0.0009$ ) were  
121 lower in the ‘noise’ group compared to the ‘clear’ group, but only for the first of four stories (FDR-  
122 thresholded). Moreover, listeners in the ‘noise group’ rated effort higher for the first three stories  
123 compared to listeners in the ‘clear’ group (1<sup>st</sup>:  $p = 8.7 \times 10^{-6}$ ; 2<sup>nd</sup>:  $p = 0.0085$ ; 3<sup>rd</sup>:  $p = 0.0042$ ; FDR-  
124 thresholded). None of the other comparisons were significant.

125 In order to analyze more directly whether ratings change over time, a linear function was fit to  
126 ratings as a function of story number (1<sup>st</sup>, 2<sup>nd</sup>, 3<sup>rd</sup>, and 4<sup>th</sup> story). Non-parametric ranksum tests revealed  
127 more positive slopes for motivation ( $p = 0.0023$ ) and absorption ( $p = 0.0171$ ), and a more negative slope  
128 for effort ( $p = 0.0034$ ) for the ‘noise’ group compared to the ‘clear’ group.

129 ***Analyses limited to native English speakers.*** The ANOVAs revealed higher motivation, absorption,  
130 enjoyment, and comprehension, and lower effort for participants listening to clear stories compared to  
131 those listening to stories with added babble (main effect of Group; for all:  $F_{1,30} > 6$ ,  $p < 0.02$ ). The Story  
132 Number  $\times$  Group interaction was significant for motivation, absorption, enjoyment, and effort (for all:  
133  $F_{3,90} > 2.8$ ;  $p < 0.05$ ), but not for comprehension ( $F_{3,90} < 2.3$ ,  $p > 0.05$ ). There were no main effects of  
134 Story Number (for all:  $F_{3,90} < 2.5$ ,  $p > 0.05$ ).

135 Separate regression analyses for each story number revealed that motivation, absorption,  
136 enjoyment, and comprehension were lower ( $t_{30} < -2.9$ ,  $p < 0.01$ ) and effort higher ( $t_{30} = 5.228$ ,  $p =$   
137  $1.2 \times 10^{-5}$ ) in the 'noise' group compared to the 'clear' group, but only for the first of four stories (FDR-  
138 thresholded).

139 In order to examine whether changes in rating over time differ between groups, a linear function  
140 was fit to ratings as a function of story number (1<sup>st</sup>, 2<sup>nd</sup>, 3<sup>rd</sup>, and 4<sup>th</sup> story), independently for the 'clear'  
141 and 'noise' group. The slope was significantly more positive for motivation ( $t_{30} = 4.0025$ ,  $p = 0.0004$ ),  
142 absorption ( $t_{30} = 3.0567$ ,  $p = 0.0047$ ), and enjoyment ( $t_{30} = 2.332$ ,  $p = 0.0266$ ), and more negative for  
143 effort ( $t_{30} = -3.1798$ ,  $p = 0.0034$ ) for the 'noise' group compared to the 'clear' group, when nuisance  
144 variables (Sex and Age) were accounted for.

145

## References

- 146 Benjamini Y, Hochberg Y (1995) Controlling the false discovery rate: a practical and powerful approach  
147 to multiple testing. *Journal of the Royal Statistical Society Series B* 57:289-300.
- 148 Genovese CR, Lazar NA, Nichols T (2002) Thresholding of statistical maps in functional neuroimaging  
149 using the false discovery rate. *NeuroImage* 15:870–878.
- 150 Studebaker GA (1985) A "rationalized" arcsine transform. *Journal of Speech and Hearing Research*  
151 28:455-462.

152
